# Supplementary material for: New fluorine-doped H2(H2O)Nb2O6photocatalyst for the degradation of organic dyes
Source: Royal Society of Chemistry journal article supplement (doi:10.1039/c4ce01213e), 2014-09-10
Supplement: c4ce01213e1.pdf [file c4ce01213e1.pdf]

## **Electronic Supplementary Information (ESI)**

### **New-phased fluorine-doped $\text{H}_2(\text{H}_2\text{O})\text{Nb}_2\text{O}_6$ photocatalyst for the degradation of organic dyes**

Junshu Wu, Jinshu Wang\*, Hongyi Li, Yucheng Du, Xinjian Jia and Baixiong Liu

School of Materials Science and Engineering, Beijing University of Technology,

Chaoyang District, Beijing 100124, China

Contact address: wangjsh@bjut.edu.cn

Tel/Fax: +86 10 6739 1101

**Table S1.** The experimental  $d$ -values and calculated  $d$ -values according to the indices of  $\text{H}_2(\text{H}_2\text{O})\text{Ta}_2\text{O}_6$  crystallographic planes (JCPDS Card No. 74-655).

| $(hkl)$ | experimental $d$ -values (Å) | calculated $d$ -values (Å) |
|---------|------------------------------|----------------------------|
| (111)   | 6.0625                       | 6.0621                     |
| (311)   | 3.1708                       | 3.1659                     |
| (222)   | 3.0311                       | 3.0375                     |
| (400)   | 2.6301                       | 2.6250                     |
| (331)   | 2.4149                       | 2.4089                     |
| (422)   | 2.1484                       | 2.1433                     |
| (511)   | 2.0256                       | 2.0207                     |
| (440)   | 1.8617                       | 1.8562                     |
| (531)   | 1.7795                       | 1.7748                     |
| (620)   | 1.6637                       | 1.6602                     |
| (533)   | 1.6060                       | 1.6012                     |
| (622)   | 1.5878                       | 1.5829                     |
| (444)   | 1.5203                       | 1.5155                     |
| (711)   | 1.4750                       | 1.4703                     |
| (731)   | 1.3714                       | 1.3670                     |
| (800)   | 1.3165                       | 1.3125                     |
| (660)   | 1.2415                       | 1.2374                     |
| (751)   | 1.2164                       | 1.2124                     |
| (662)   | 1.2087                       | 1.2044                     |

In cubic system,  $a = b = c$ . The crystallographic lattice constants of as-obtained niobium oxide sample are calculated by using the following equation.

$$d_{hkl} = \frac{a}{\sqrt{h^2 + k^2 + l^2}} \quad (1)$$

The lattice constant  $a$  value is thus obtained by using the  $d$ -value of the sample (6.0625) and the corresponding indices of  $\text{H}_2(\text{H}_2\text{O})\text{Ta}_2\text{O}_6$  (111) crystallographic plane (JCPDS Card No. 74-655). Then other  $d$ -values of our sample can be calculated according to formula (1), which are compared with experimental  $d$ -values, as shown in Table S1.

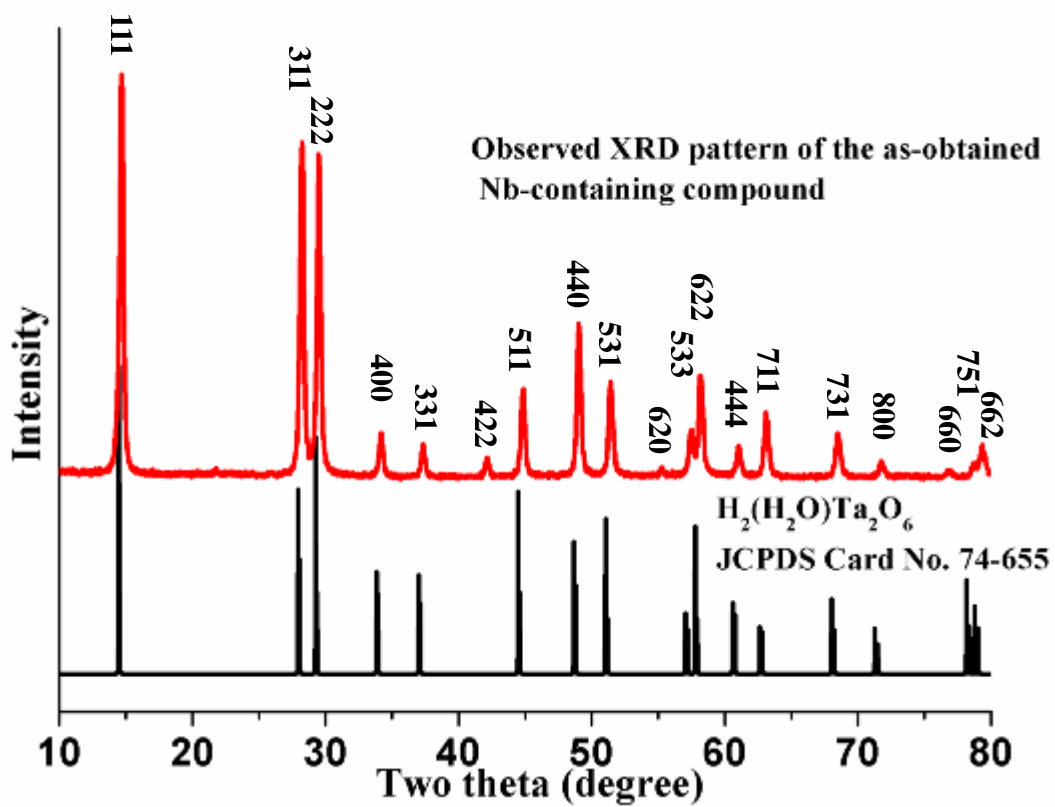

**Figure S1.** XRD pattern of the as-obtained Nb-containing compound. The XRD pattern is indexed according to the standard cubic  $H_2(H_2O)Ta_2O_6$  pattern in JCPDS Card No. 74-655.

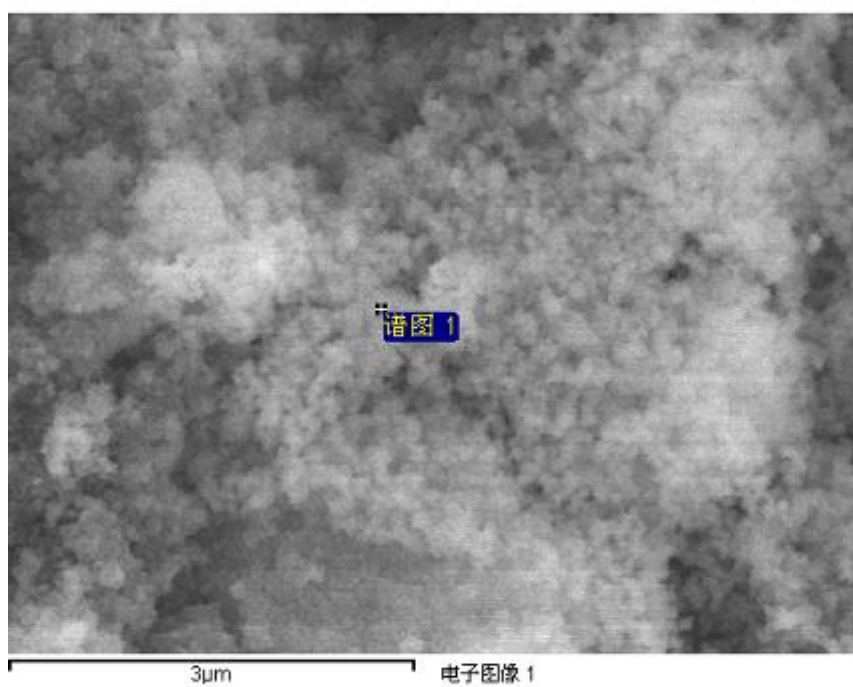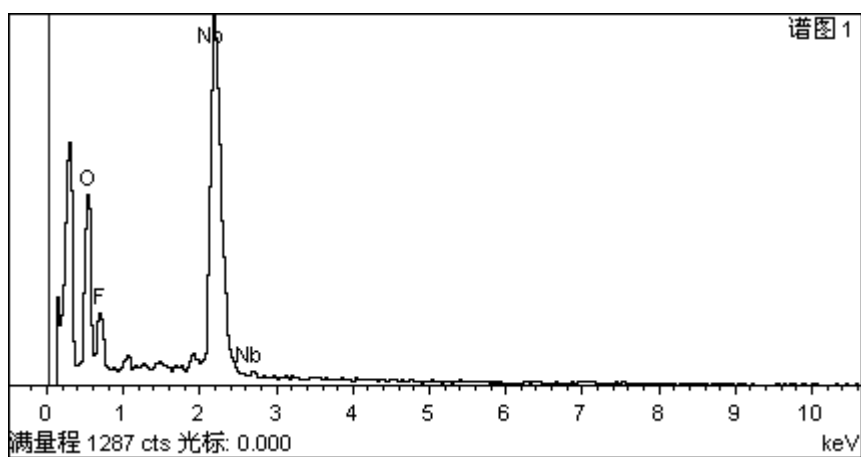

**Figure S2.** EDX spectrum of F-doped  $\text{H}_2(\text{H}_2\text{O})\text{Nb}_2\text{O}_6$  nanosized crystals.

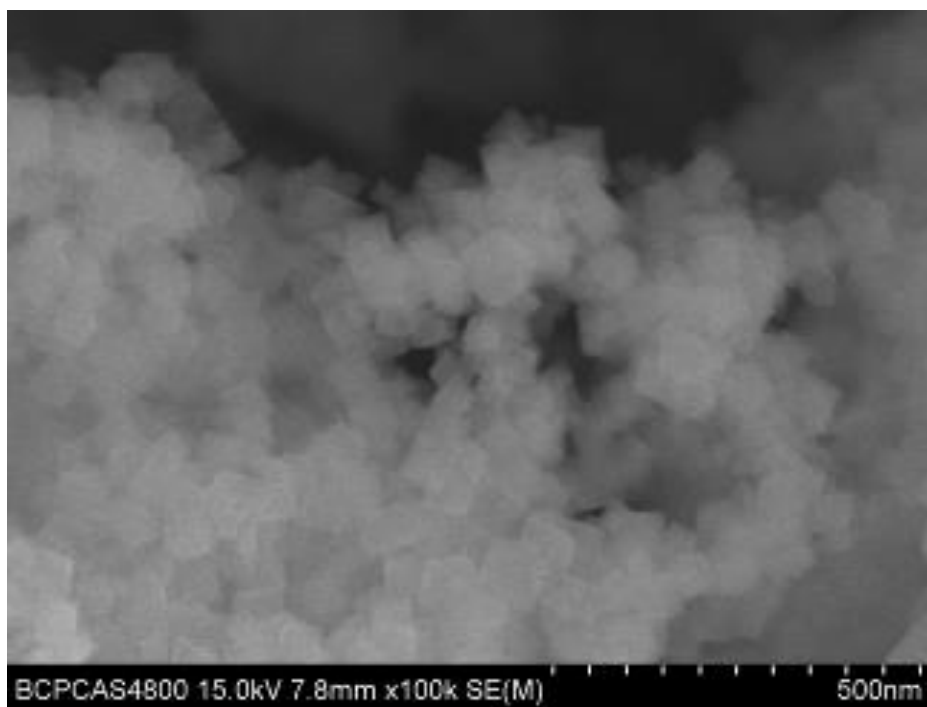

**Figure S3.** SEM image of the products obtained by hydrothermal treatment of amorphous  $\text{Nb}_2\text{O}_5 \cdot n\text{H}_2\text{O}$  in 10 mL aqueous solution containing  $\text{NH}_4\text{F}$  (0.20 g),  $(\text{NH}_4)_2\text{SO}_4$  (0.20 g), and SDBS (0.10 g) at 160–170 °C for 120–132 h.

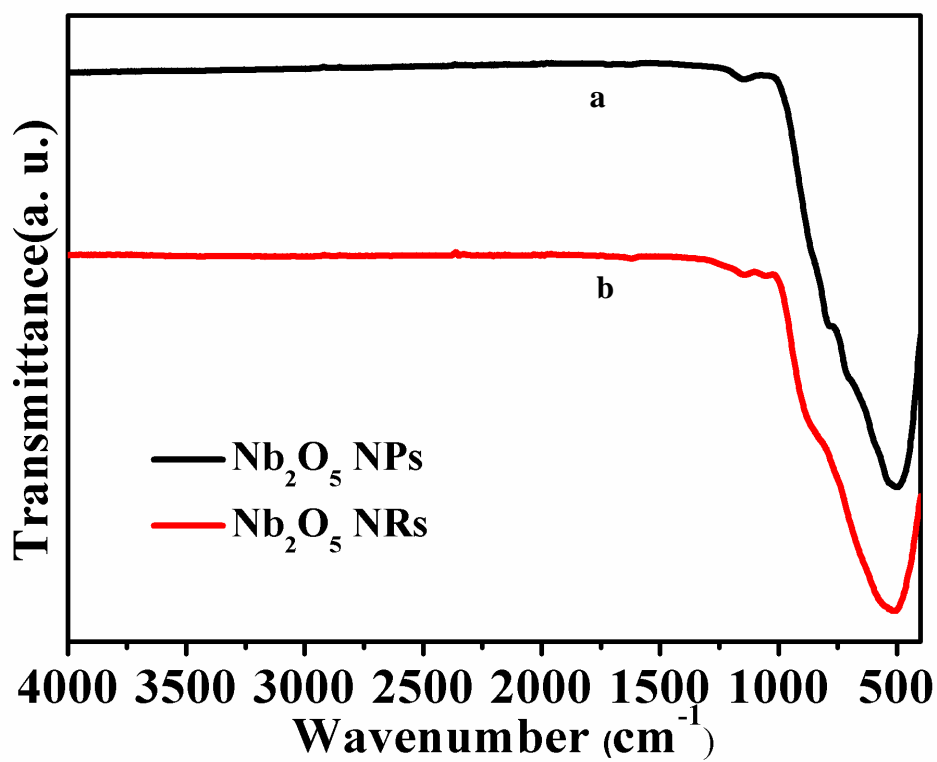

**Figure S4.** FT-IR spectra of Nb<sub>2</sub>O<sub>5</sub> NPs obtained by calcining F-doped H<sub>2</sub>(H<sub>2</sub>O)Nb<sub>2</sub>O<sub>6</sub> at 500 °C for 1 h and Nb<sub>2</sub>O<sub>5</sub> NRs.

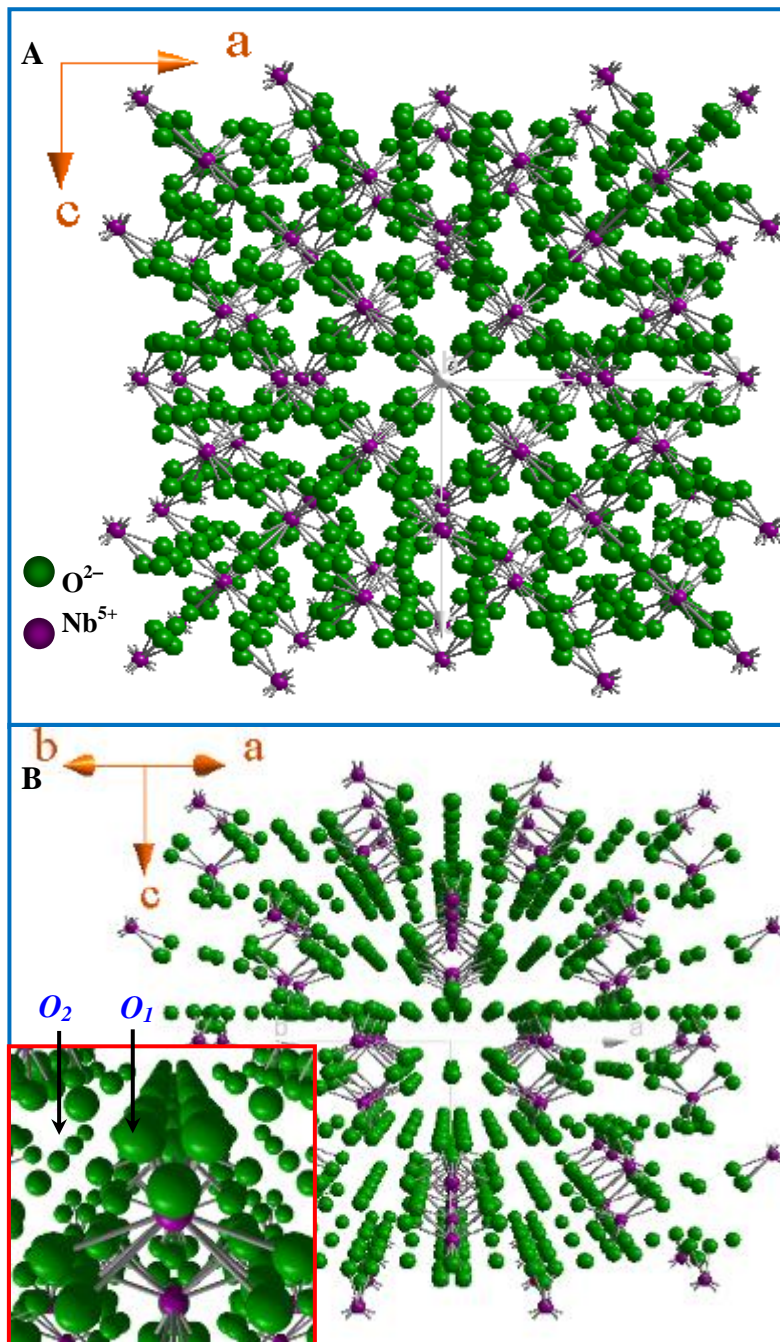

**Figure S5.** The crystal structure of  $\text{H}_2(\text{H}_2\text{O})\text{Nb}_2\text{O}_6$  in ball-and-stick mode, viewing along (A)  $b$  axis and (B)  $[110]$  direction (green: oxygen; purple: niobium). The inset in panel B shows two unique crystallographic O.



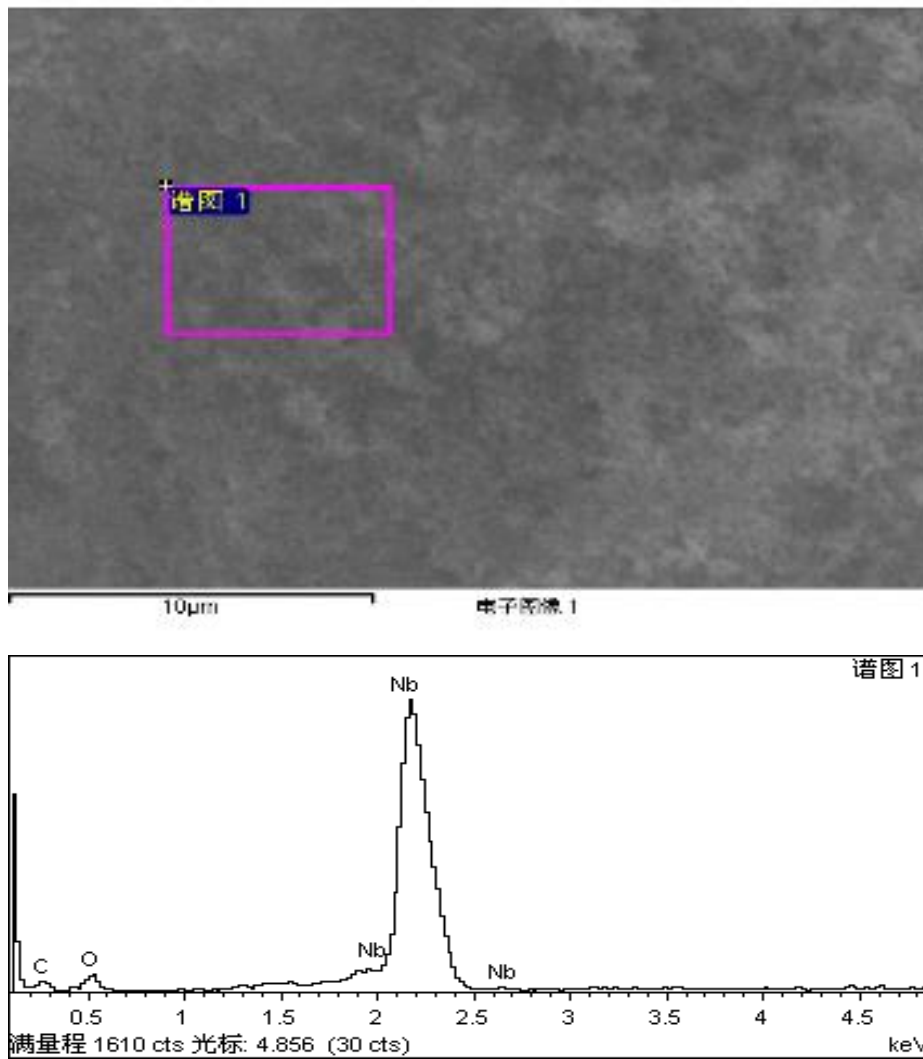

**Figure S6.** EDX spectrum of  $\text{Nb}_2\text{O}_5$  NPs after calcining F-doped  $\text{H}_2(\text{H}_2\text{O})\text{Nb}_2\text{O}_6$  sample at 500 °C for 1 h, indicating no F element in the final product.

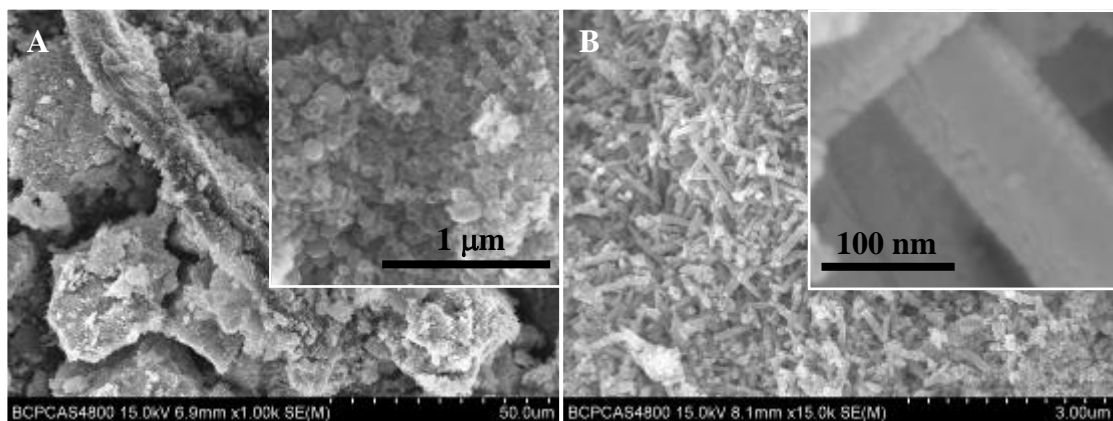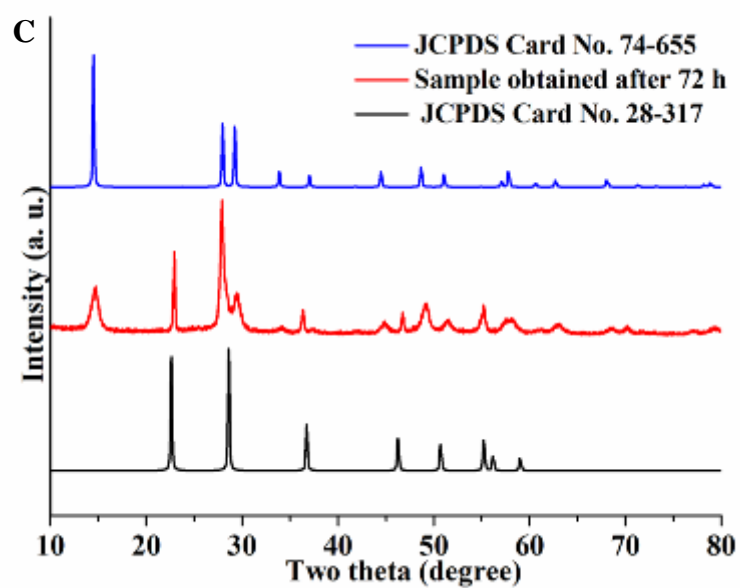

**Figure S7.** Typical SEM images of the products prepared at 160–170 °C with different time. (A) 14 h. (B) 72 h. (C) XRD patterns of the product obtained after 72 h reaction, showing that it is a mixture containing niobium oxide (JCPDS Card No. 28-317).

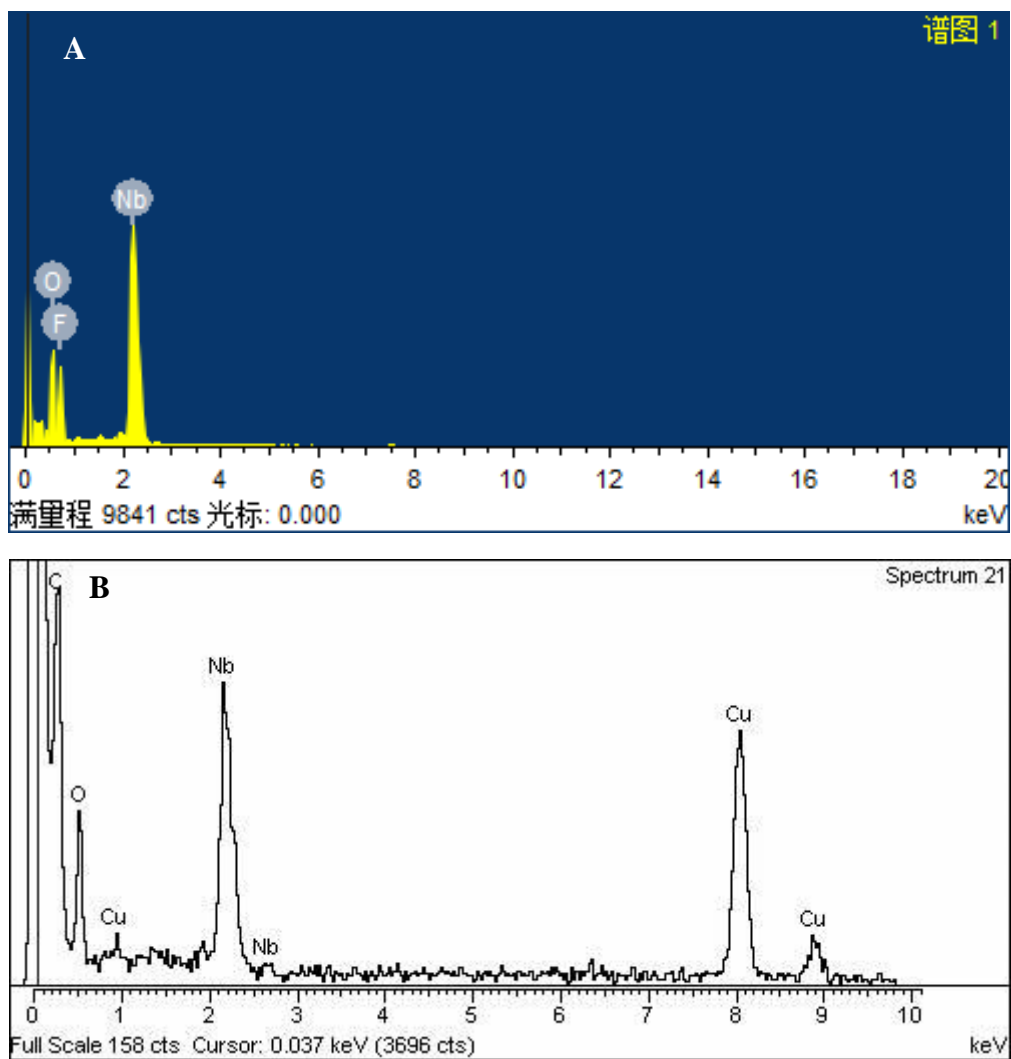

**Figure S8.** EDX spectra of (A) Nb<sub>2</sub>O<sub>5</sub> NR-precursor and (B) Nb<sub>2</sub>O<sub>5</sub> NRs obtained after calcining Nb<sub>2</sub>O<sub>5</sub> NR-precursor at 700 °C for 1 h, indicating no F element in the final product (Cu signal comes from a TEM grid).

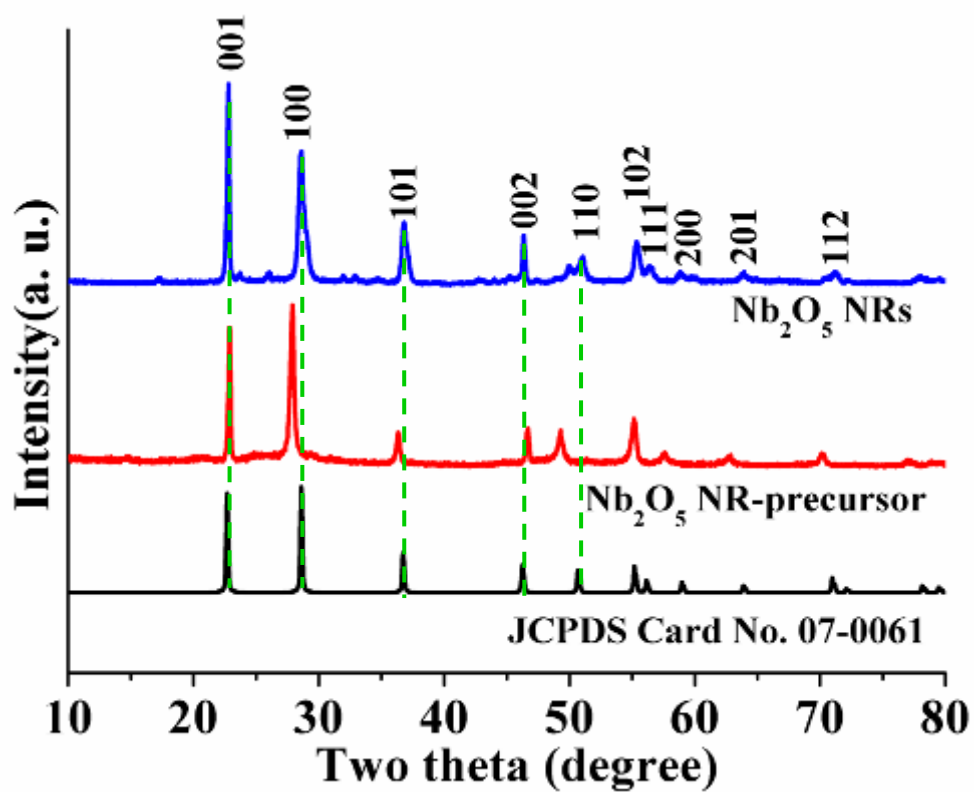

**Figure S9.** XRD patterns of Nb<sub>2</sub>O<sub>5</sub> NR-precursor and Nb<sub>2</sub>O<sub>5</sub> NRs. The XRD pattern of Nb<sub>2</sub>O<sub>5</sub> NRs is indexed as the Nb<sub>2</sub>O<sub>5</sub> phase (JCPDS Card No. 07-0061).

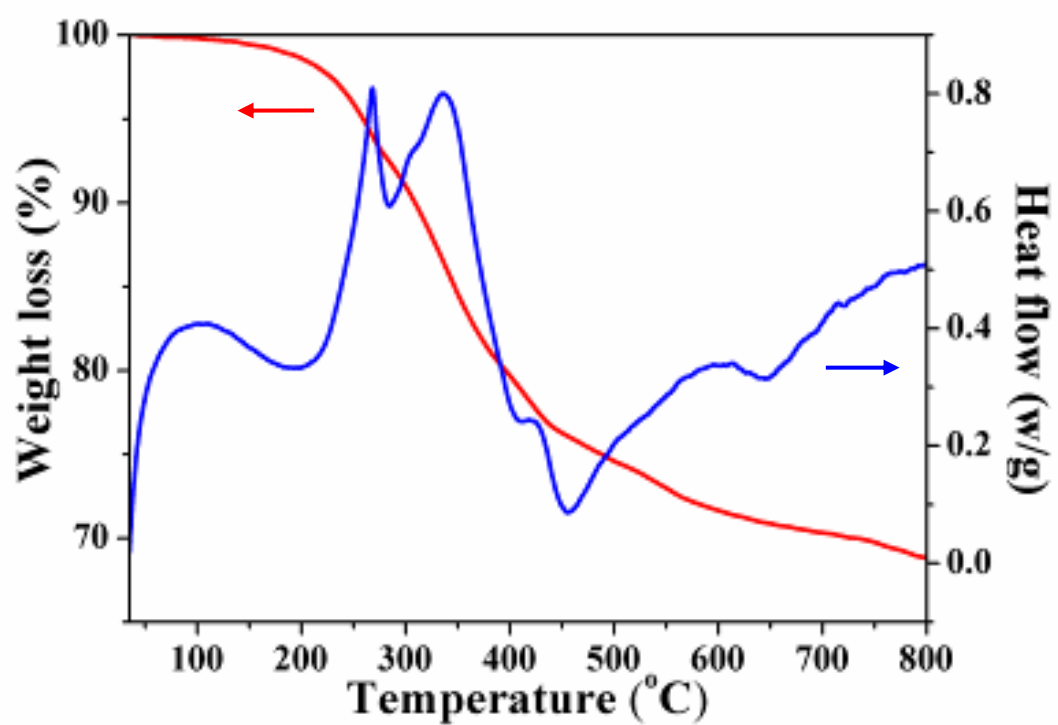

**Figure S10.** TG-DSC curves of Nb<sub>2</sub>O<sub>5</sub> NR-precursor.

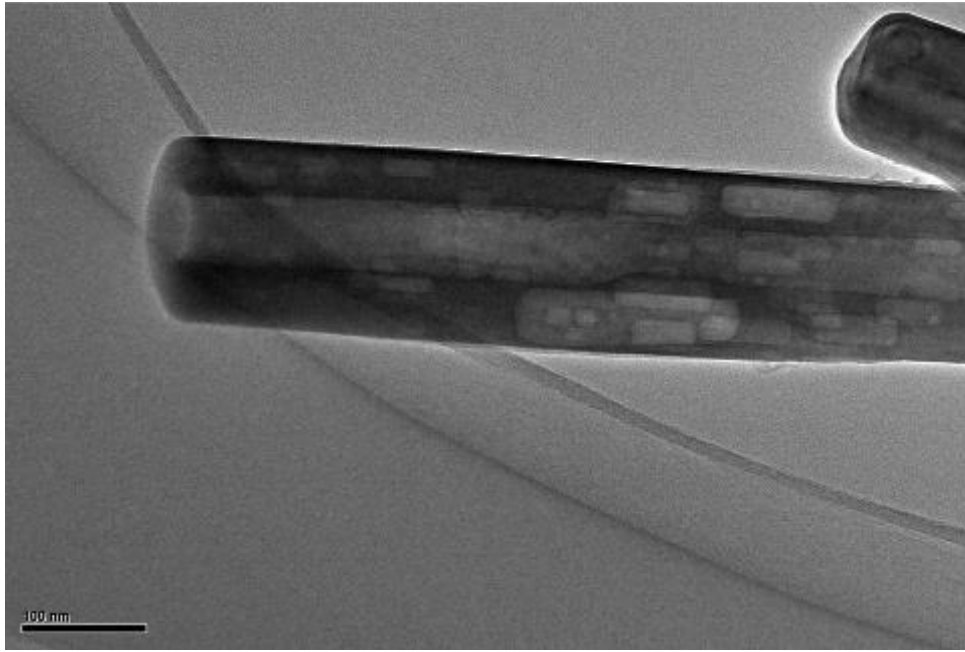

**Figure S11.** TEM image of Nb<sub>2</sub>O<sub>5</sub> NRs, showing the porous surface after calcination at 700 °C for 1 h.

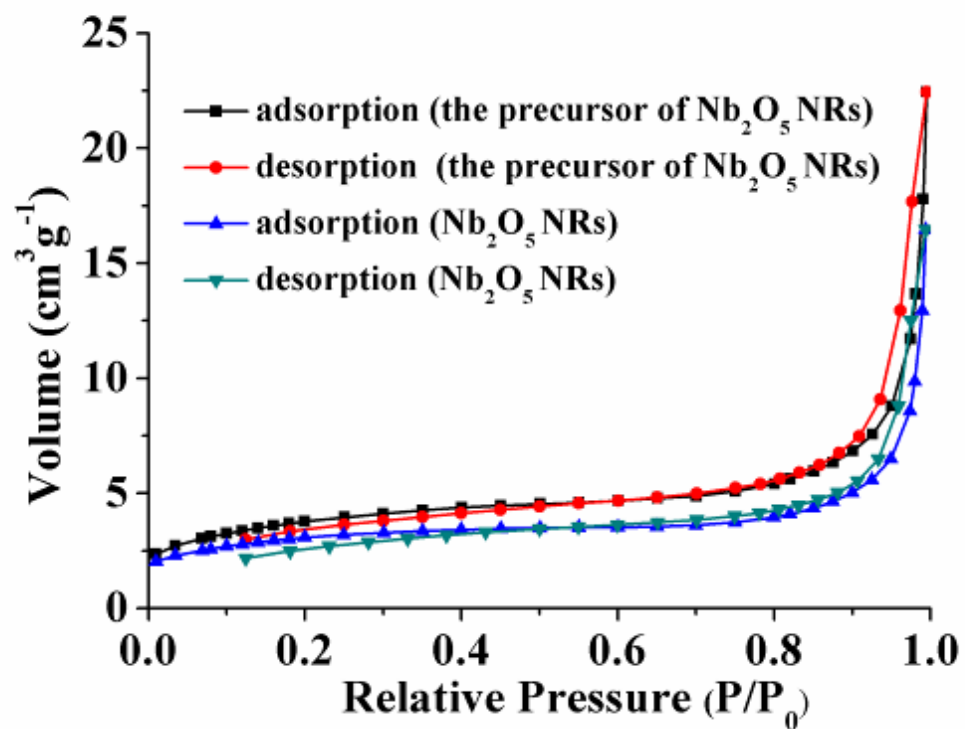

**Figure S12.** Nitrogen adsorption-desorption isotherms of as-prepared Nb<sub>2</sub>O<sub>5</sub> NR-precursor and Nb<sub>2</sub>O<sub>5</sub> NRs.

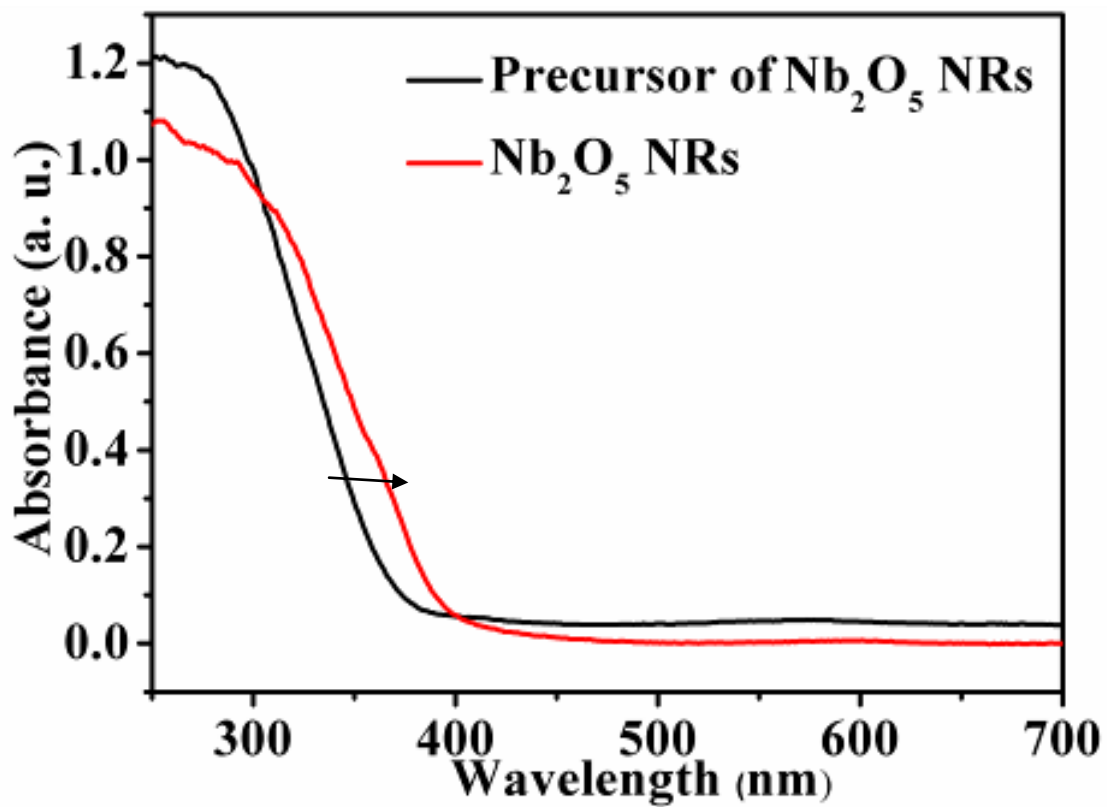

**Figure S13.** UV-vis absorption spectra of Nb<sub>2</sub>O<sub>5</sub> NRs and Nb<sub>2</sub>O<sub>5</sub> NR-precursor.



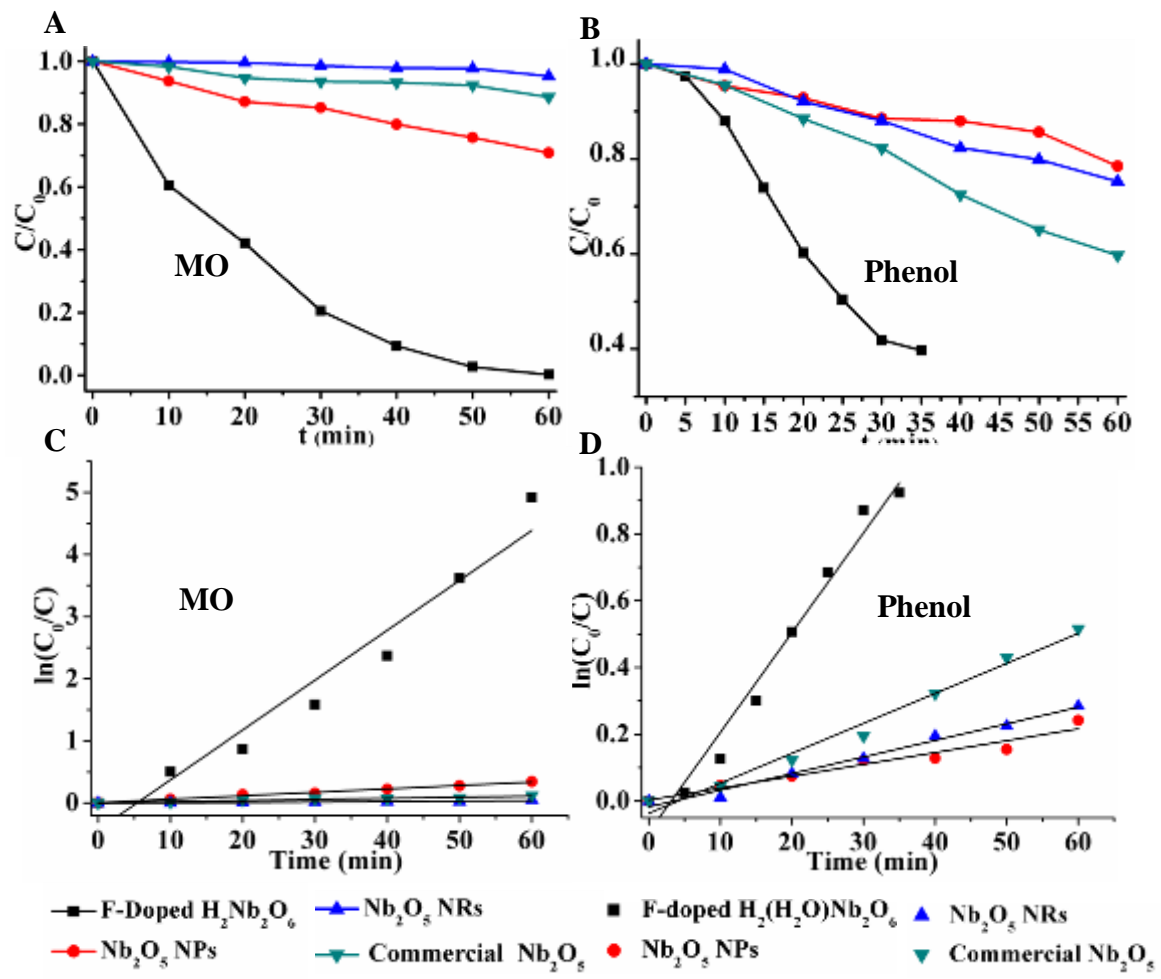

**Figure S14.** Photocatalytic performances of methyl orange (MO) and phenol under UV light irradiation

**Table S2.** The parameters of adopted pseudo first order reaction kinetics.

| Samples                                                                    | MB                        |                | MO                        |                | Phenol                    |                |
|----------------------------------------------------------------------------|---------------------------|----------------|---------------------------|----------------|---------------------------|----------------|
|                                                                            | k<br>(min <sup>-1</sup> ) | R <sup>2</sup> | k<br>(min <sup>-1</sup> ) | R <sup>2</sup> | k<br>(min <sup>-1</sup> ) | R <sup>2</sup> |
| F-doped<br>H <sub>2</sub> (H <sub>2</sub> O)Nb <sub>2</sub> O <sub>6</sub> | 0.34876                   | 0.96257        | 0.08025                   | 0.94256        | 0.0299                    | 0.96988        |
| Nb <sub>2</sub> O <sub>5</sub> NPs                                         | 0.12697                   | 0.98351        | 0.00552                   | 0.99002        | 0.00355                   | 0.94024        |
| Nb <sub>2</sub> O <sub>5</sub> NRs                                         | 0.05106                   | 0.96610        | 0.00072599                | 0.83176        | 0.00497                   | 0.9829         |
| Commercial<br>Nb <sub>2</sub> O <sub>5</sub> powder                        | 0.01341                   | 0.99114        | 0.0018                    | 0.92174        | 0.00898                   | 0.98049        |
| P25-TiO <sub>2</sub>                                                       | 0.14983                   | 0.95276        |                           |                |                           |                |

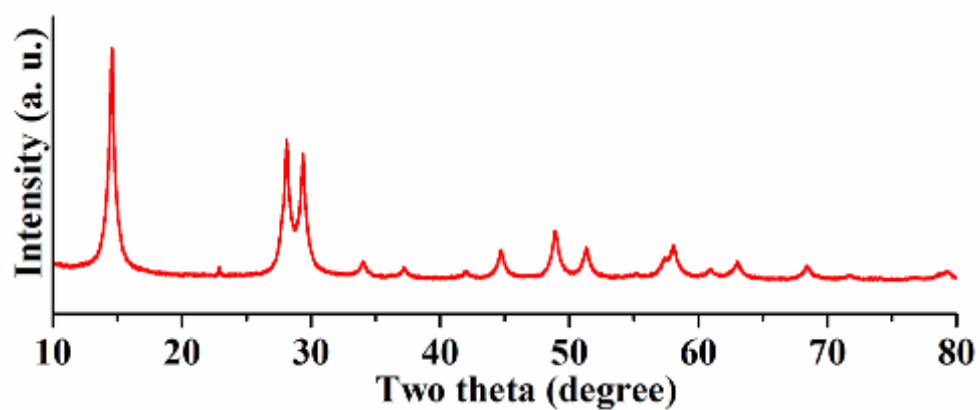

**Figure S15.** XRD patterns for F-doped  $\text{H}_2(\text{H}_2\text{O})\text{Nb}_2\text{O}_6$  catalysts after photodegradation of 20 mg/L MB aqueous solution for five cycles, indicating its stability when applied as a photocatalyst under UV light irradiation.
